# Supplementary material
Source: ML conference proceedings conference paper supplement (https://openaccess.thecvf.com/content/WACV2024/html/Li_Disentangled_Pre-Training_for_WACV_2024_paper.html)
Supplement: Supplementary file 1 [file Li_Disentangled_Pre-Training_for_WACV_2024_supplemental.pdf]

# Disentangled Pre-training for Image Matting (Supplementary Material)

Yanda Li<sup>1</sup>, Zilong Huang<sup>2</sup>, Gang Yu<sup>2</sup>, Ling Chen<sup>1</sup>, Yunchao Wei<sup>3</sup>, Jianbo Jiao<sup>4</sup>  
<sup>1</sup>University of Technology Sydney, Australia <sup>2</sup>Tencent, China  
<sup>3</sup>Beijing Jiaotong University, China <sup>4</sup>University of Birmingham, UK  
{liyanda95, wychao1987}@gmail.com, {zilonghuang, skicyyu}@tencent.com  
Ling.Chen@uts.edu.au, j.jiao@bham.ac.uk

## 1. Limitations

The training data we used is class-agnostic, and as a result no semantic information was considered explicitly (though maybe implicitly), which may restrict the potential of the proposed framework to be applied to other semantic-related tasks.

## 2. Comparison with the Dense-CL Method

To verify our effectiveness, we compare our DPT with DenseCL [2] based on GCA [1]. Since the backbone of GCA is different from that of DenseCL, for a fair comparison, we replace the backbone with the ResNet50, and perform fine-tuning after loading pre-trained weights from DenseCL. As shown in Table 1, our DPT achieves better performance with fewer parameters.

Table 1. Compare with DenseCL based on Comp-1k.

| Method | Init.      | Backbone | SAD↓        | MSE ( $10^{-3}$ )↓ |
|--------|------------|----------|-------------|--------------------|
| GCA    | DenseCL    | ResNet50 | 45.9        | 13.0               |
| GCA    | Supervised | ResNet34 | 35.3        | 9.1                |
| GCA    | DPT (Ours) | ResNet34 | <b>33.0</b> | <b>8.3</b>         |

## 3. Ablation on losses

In our DPT, we adopt three kinds of losses, L1 regression loss, Composition loss and Laplacian loss. The impact of these loss functions ( $L_{l1}$ ,  $L_{lap}$  and  $L_{comp}$ ) on the final performance is shown in Table 2.

Table 2. Ablation on losses (50 epochs based on MatteFormer).

| Method      | Loss                          | SAD↓        | MSE ( $10^{-3}$ )↓ |
|-------------|-------------------------------|-------------|--------------------|
| MatteFormer | $L_{l1}$                      | 21.9        | 3.6                |
| MatteFormer | $L_{l1} + L_{lap}$            | 22.5        | 3.3                |
| MatteFormer | $L_{l1} + L_{comp}$           | 22.2        | 3.5                |
| MatteFormer | $L_{l1} + L_{lap} + L_{comp}$ | <b>21.0</b> | <b>3.2</b>         |

## 4. More fine-tuning qualitative results on Composition-1k

We fine-tune on Composition-1k with DPT initialization. As Fig. 1, Fig. 2, Fig. 3, Fig. 4 show, we provide more qualitative results of our DPT on the Composition-1k test set. From the results, it can be seen that our method performs well in various detailed foreground objects.

## 5. More fine-tuning qualitative results on Distinct-646

As Fig. 5 – Fig. 8 show, we further present more qualitative results of our DPT on Distinct-646 [1]. We first generate trimap by randomly dilating alpha mattes from the ground truth alpha matte with a threshold of 20 (following [3]). Then we use the fine-tuning model on Composition-1k to test directly on Distinct-646. We can see that our DPT achieves good performance, especially in detailed regions.

## 6. More fine-tuning qualitative results on Natural human images

To show the robustness of our method, we use a fine-tuning model on Composition-1k to test on 2k resolution natural human images as shown in Fig. 9. From left to right, we provide the image, generated alpha matte  $\alpha$ , and the synthetic foreground generated by  $\alpha$  and image. We can see that our method performs well at extracting the boundary of the human body, such as the hair part.

## References

- [1] Yu Qiao, Yuhao Liu, Xin Yang, Dongsheng Zhou, Mingliang Xu, Qiang Zhang, and Xiaopeng Wei. Attention-guided hierarchical structure aggregation for image matting. In *Proceedings of the IEEE/CVF Conference on Computer Vision and Pattern Recognition*, pages 13676–13685, 2020. 1
- [2] Xinlong Wang, Rufeng Zhang, Chunhua Shen, Tao Kong, and Lei Li. Dense contrastive learning for self-supervised visual

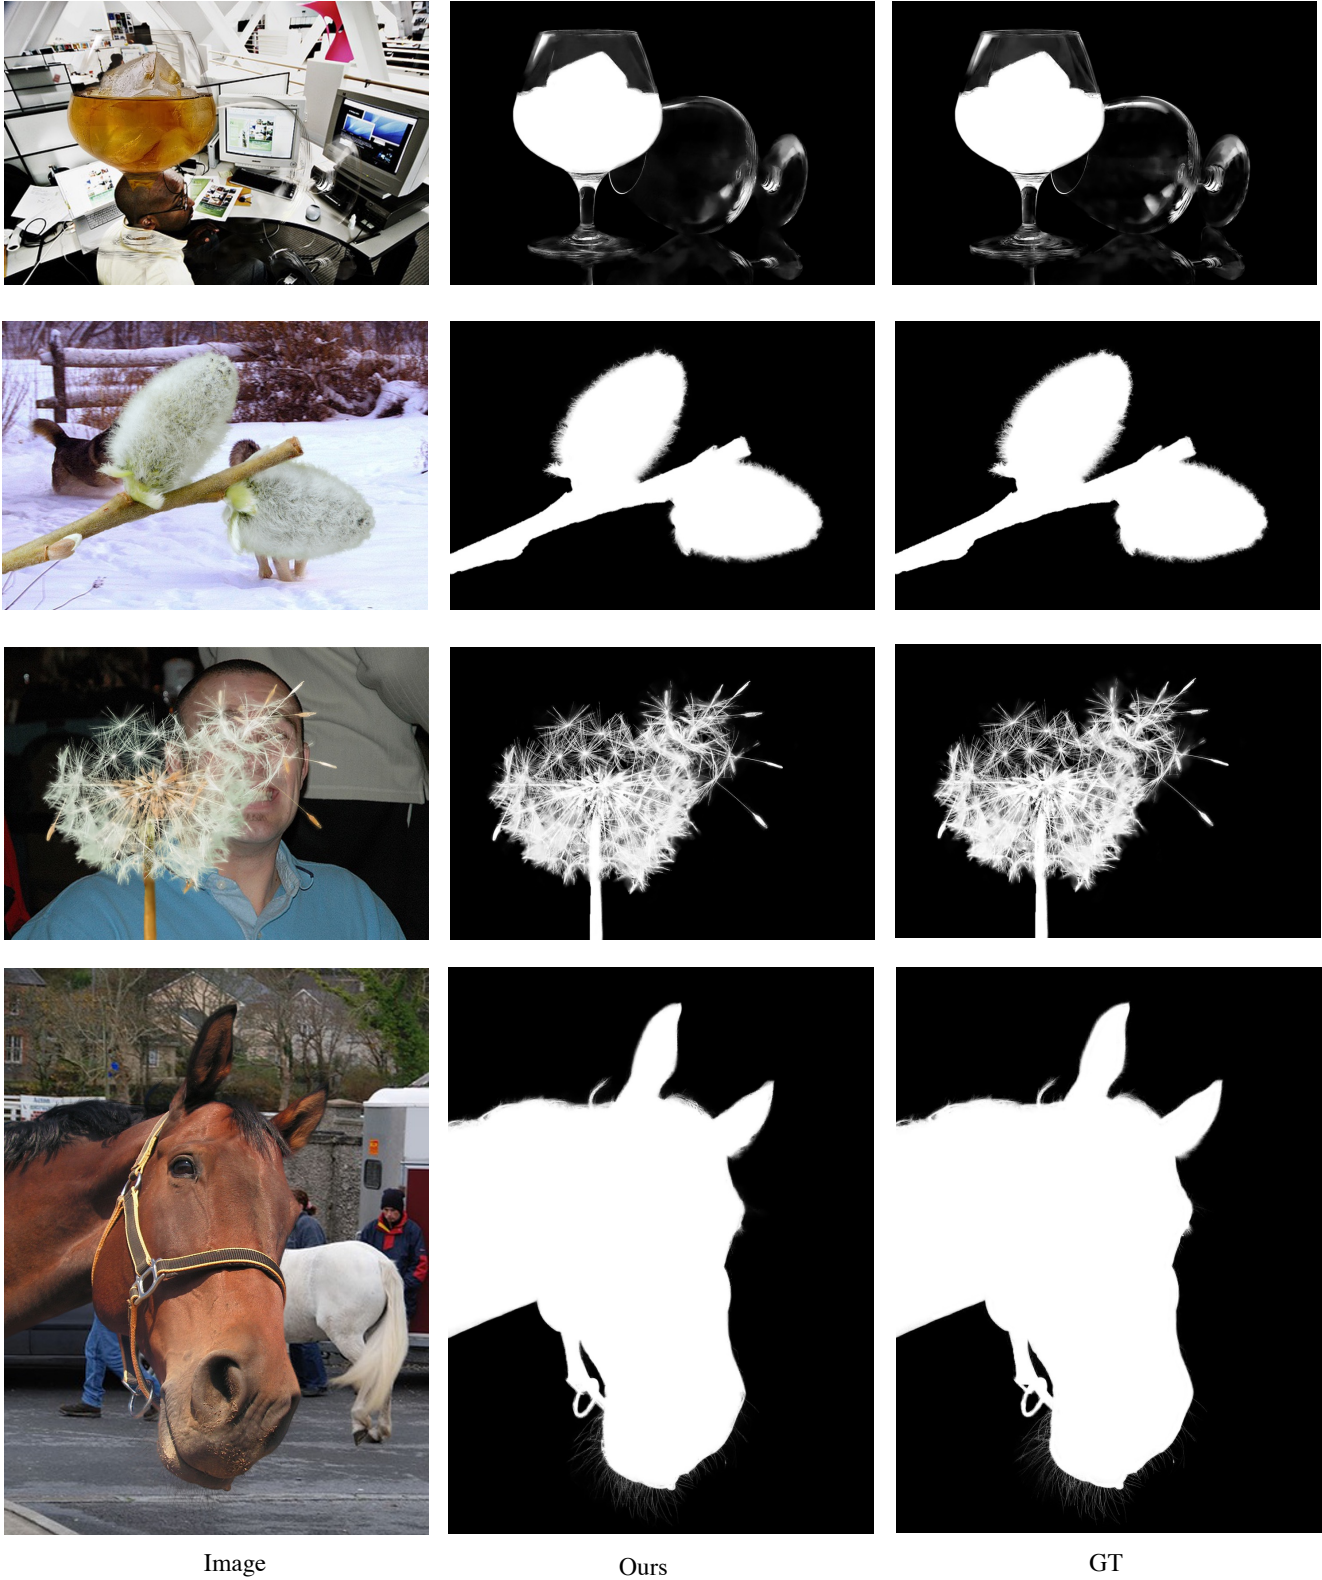

Figure 1. Qualitative results of our method on the Composition-1k test set.

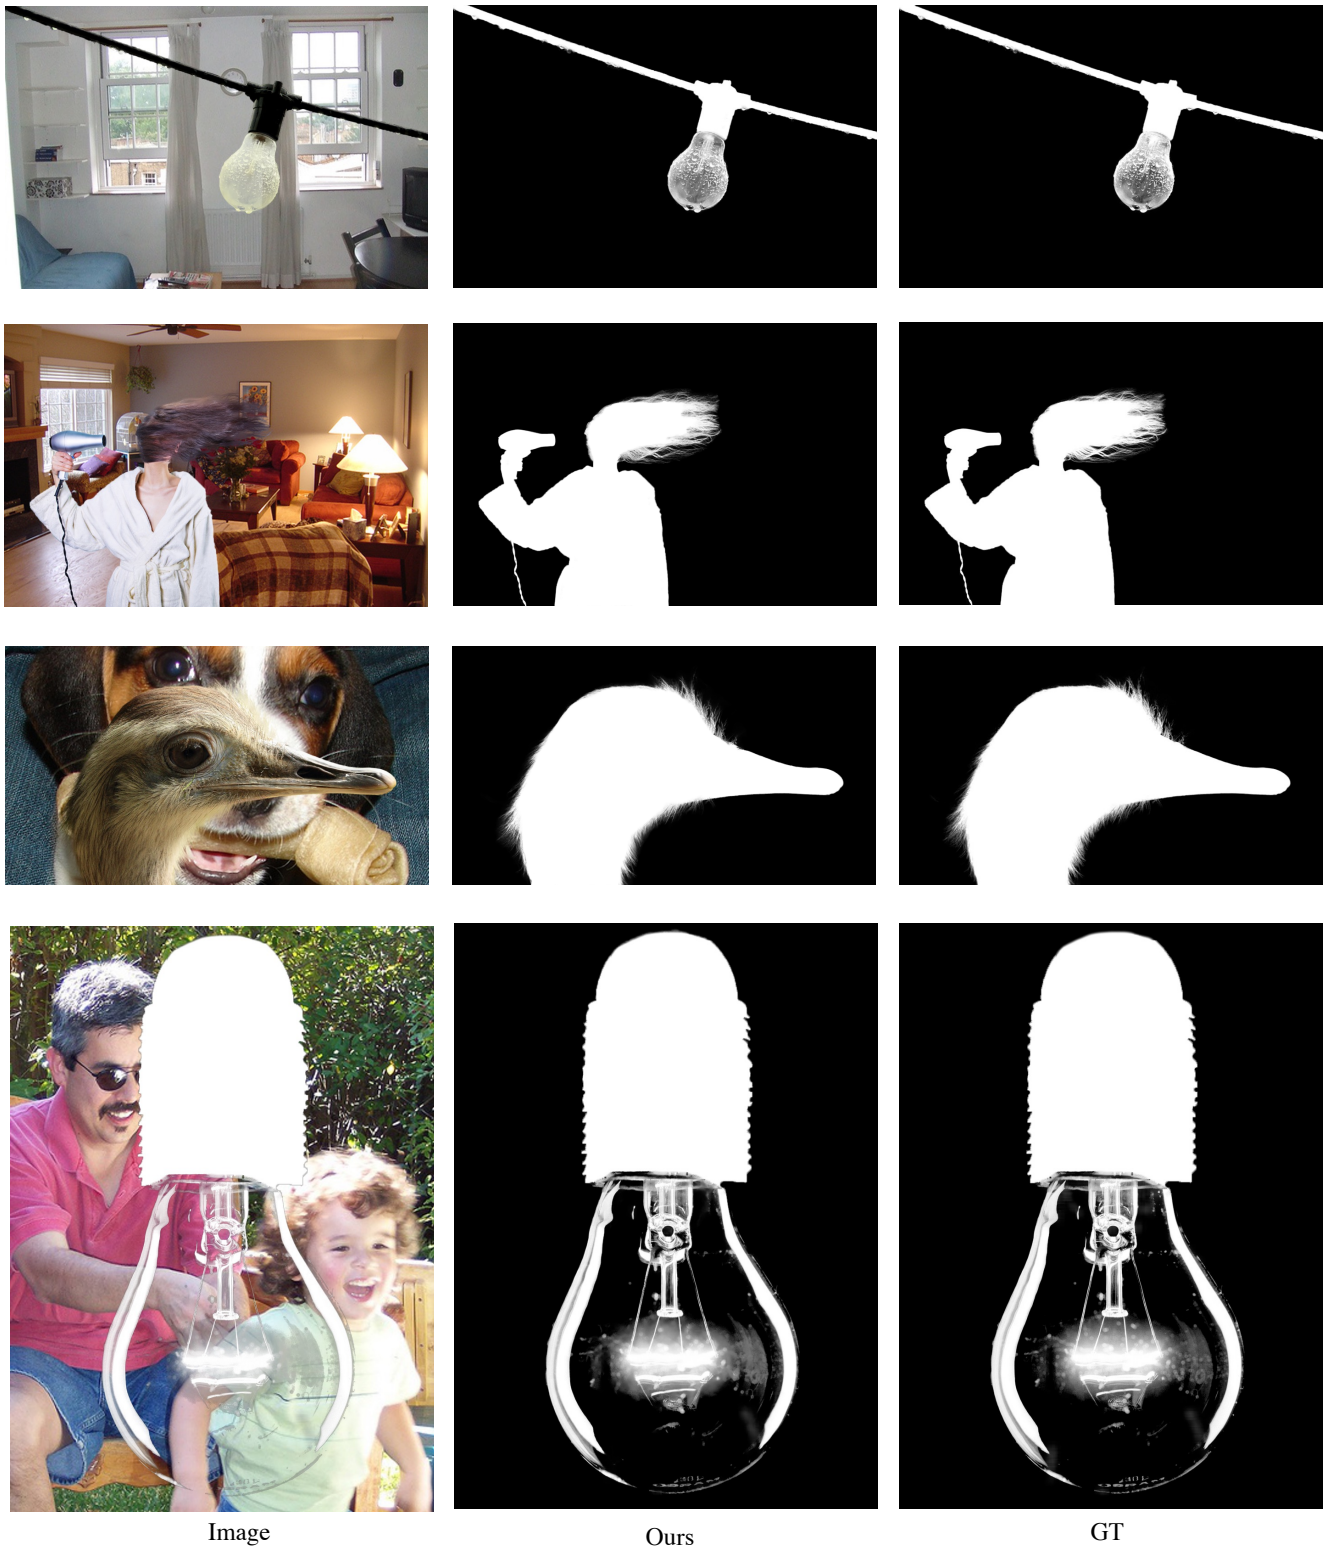

Figure 2. Qualitative results of our method on the Composition-1k test set.

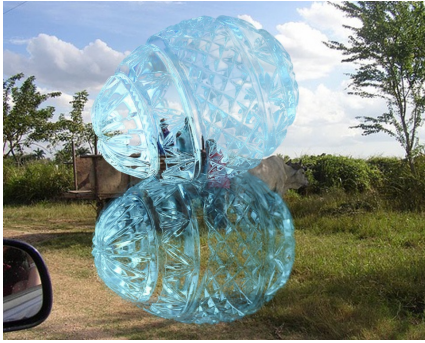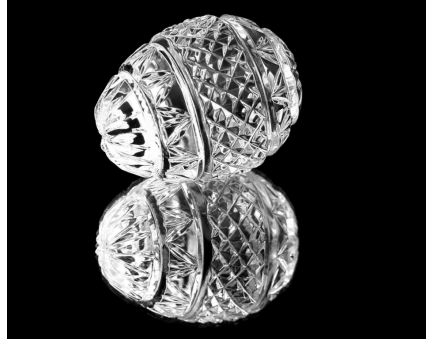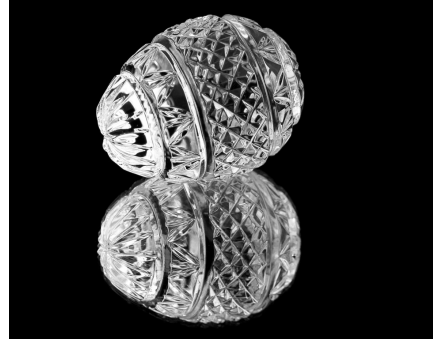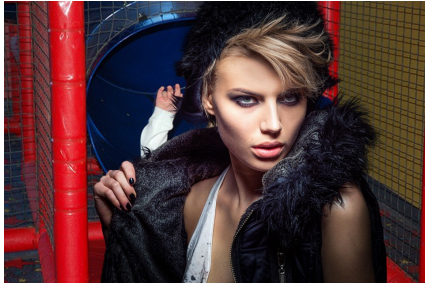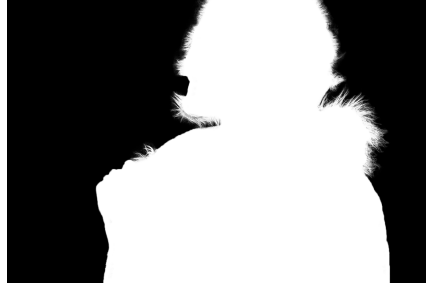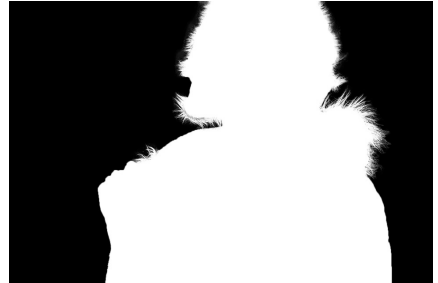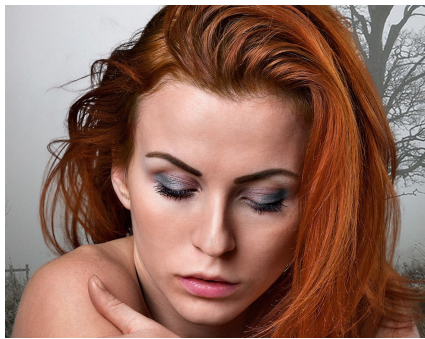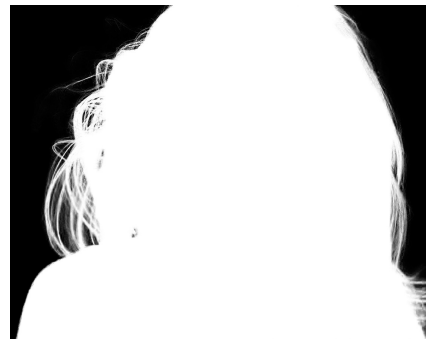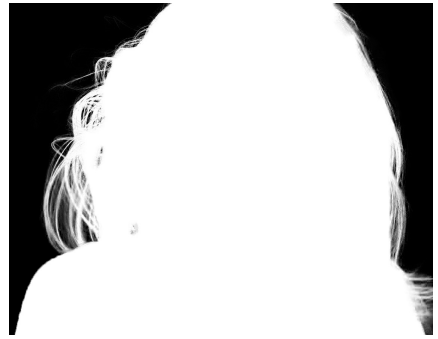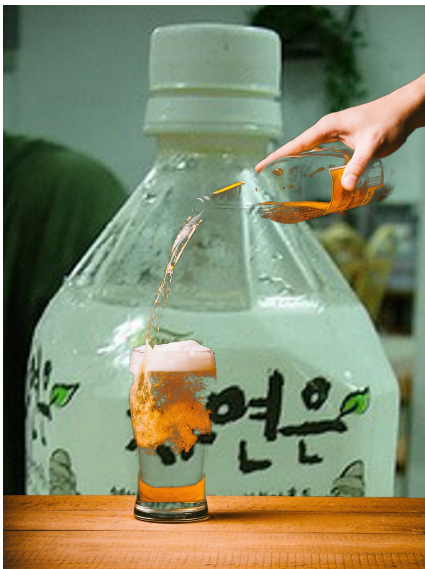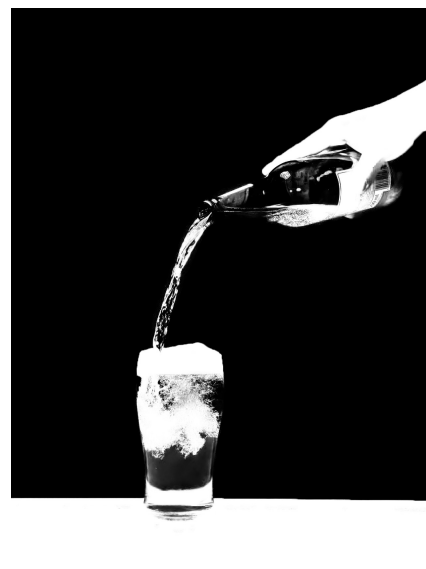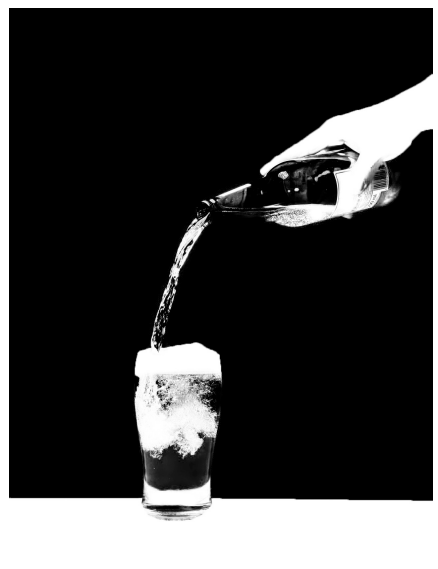

Image

Ours

GT

Figure 3. Qualitative results of our method on the Composition-1k test set.

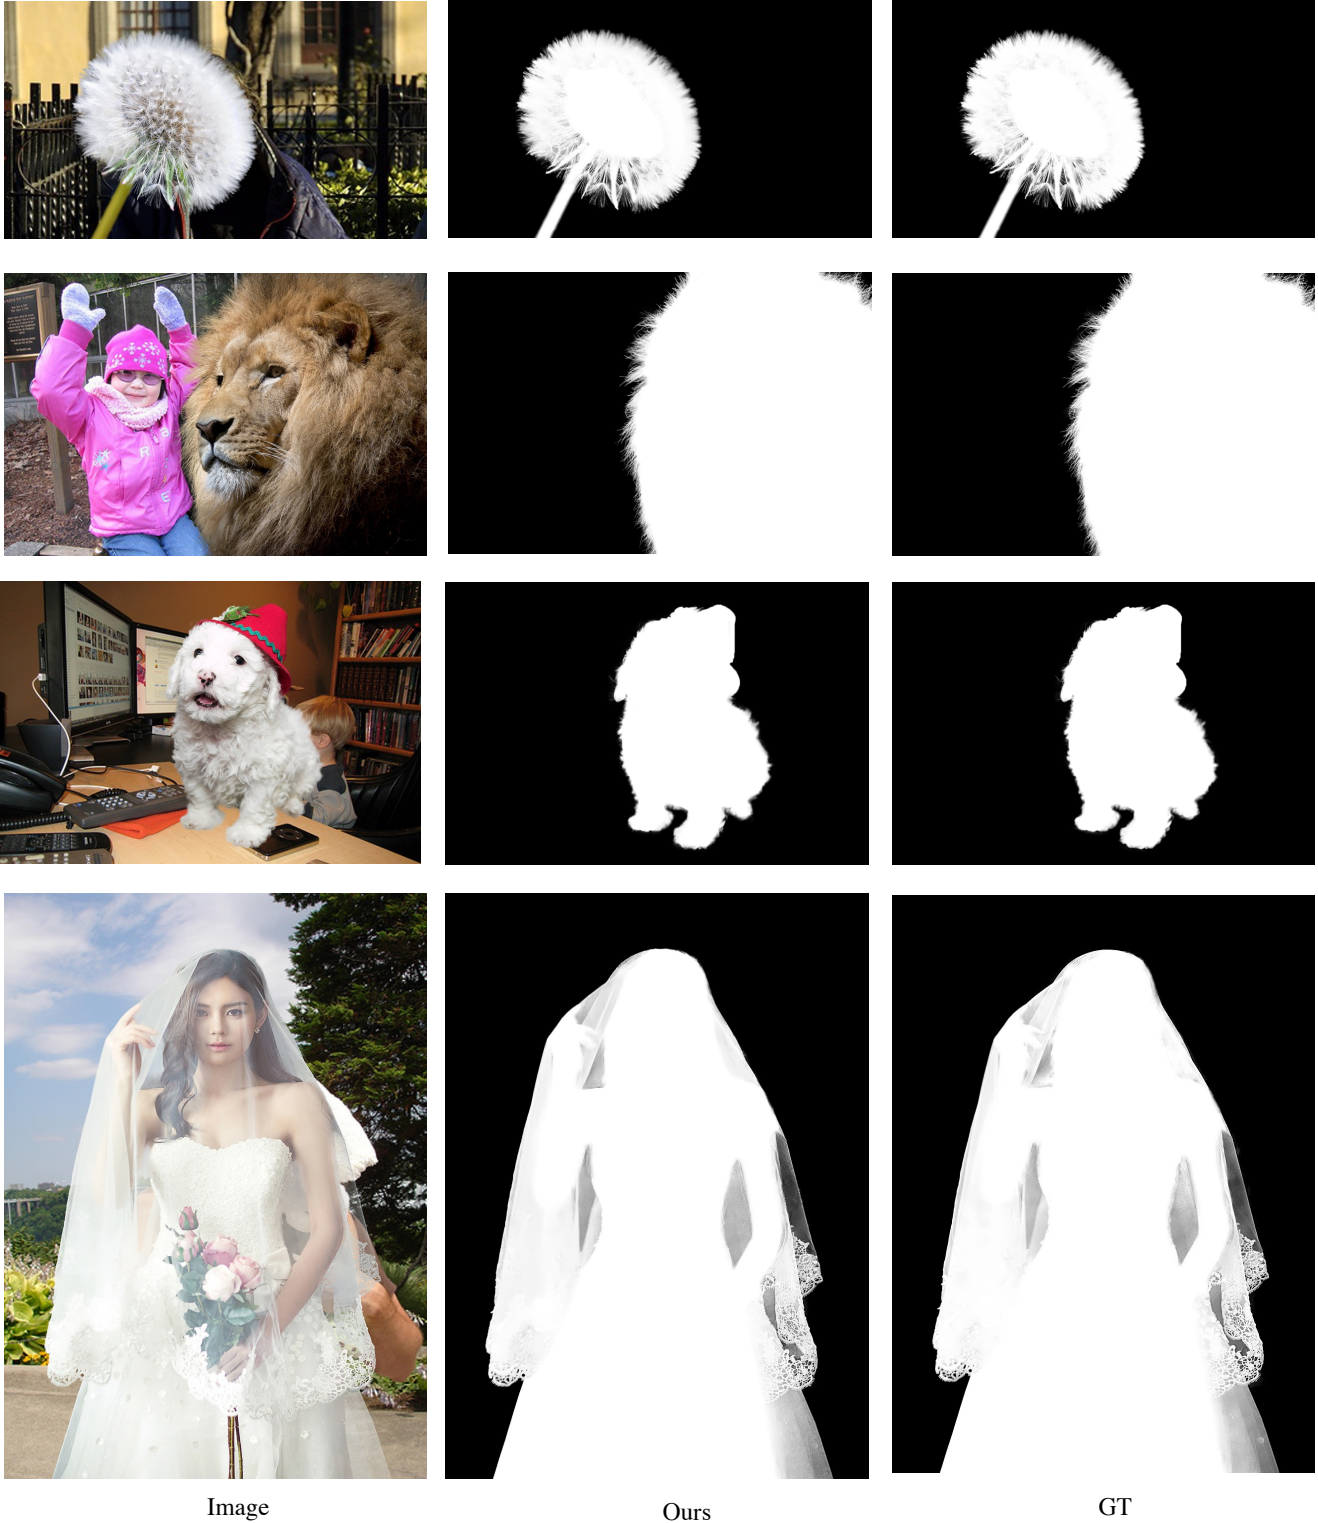

Figure 4. Qualitative results of our method on the Composition-1k test set.

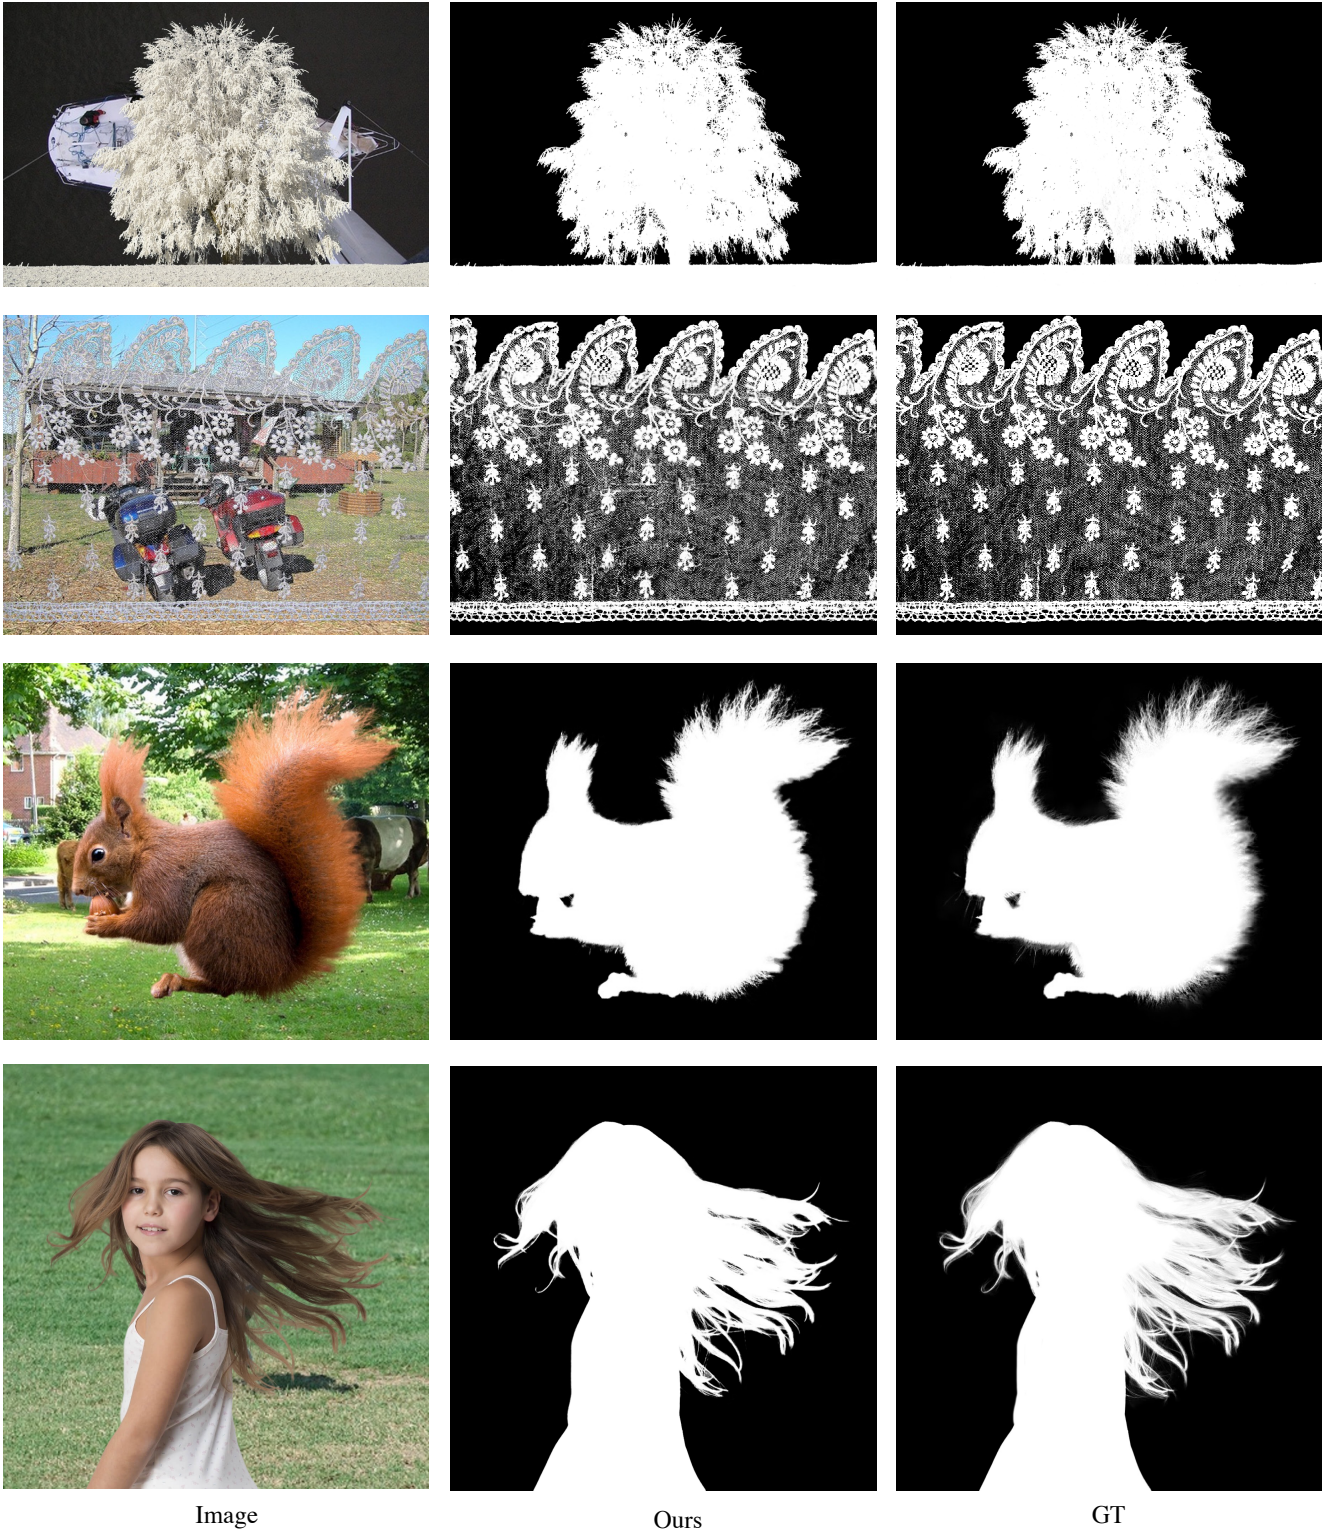

Figure 5. Qualitative results of our method on the Distinct-646 test set.

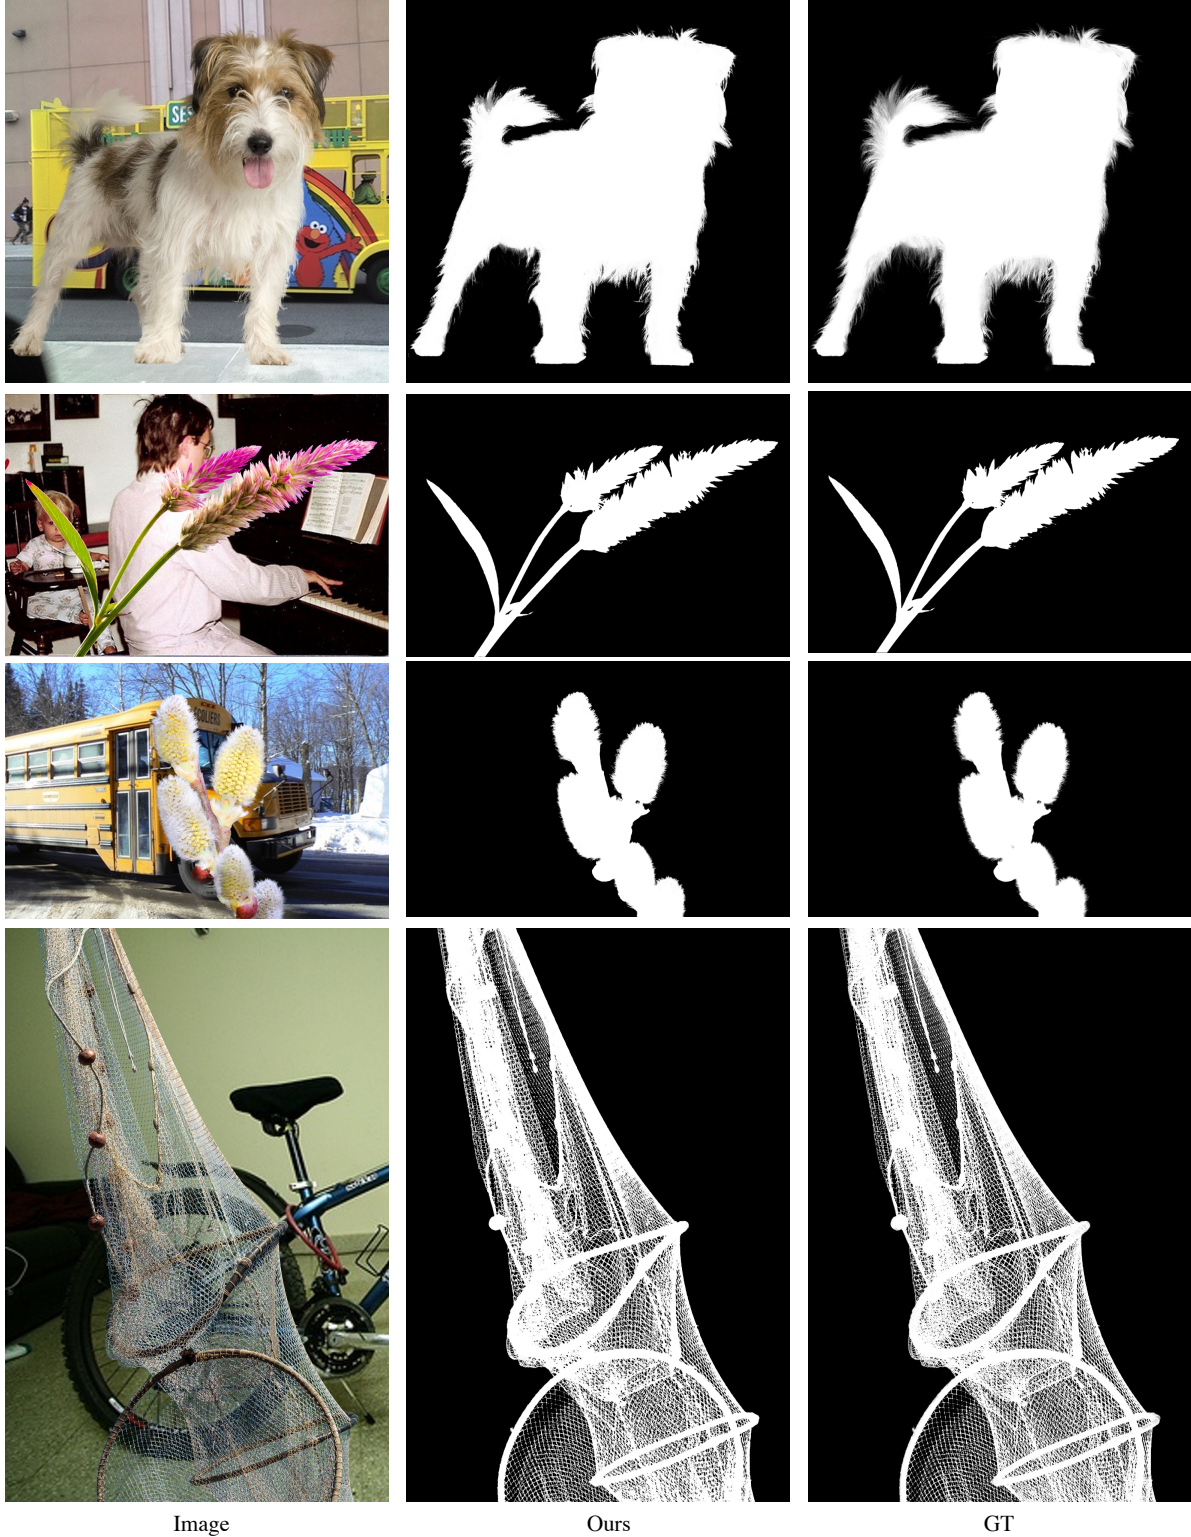

Figure 6. Qualitative results of our method on the Distinct-646 test set.

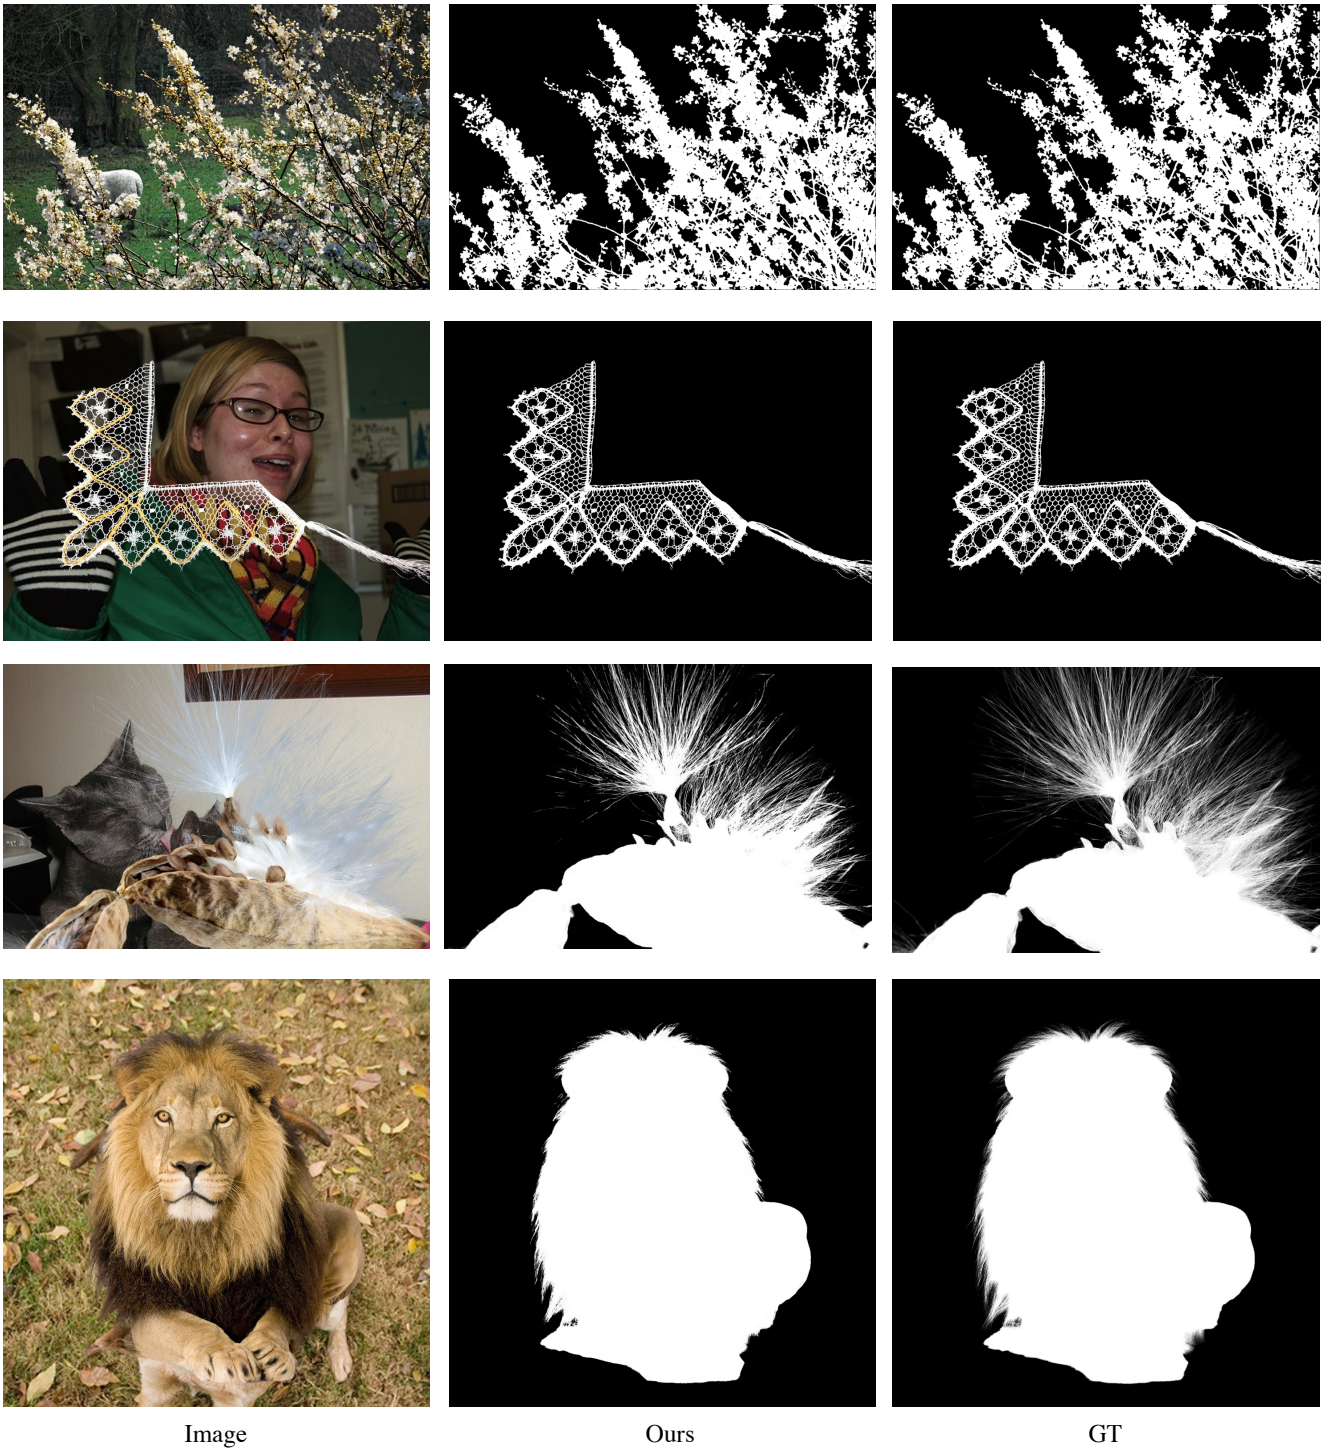

Image

Ours

GT

Figure 7. Qualitative results of our method on the Distinct-646 test set.

2021. 1

*the IEEE/CVF Conference on Computer Vision and Pattern Recognition*, pages 1154–1163, 2021. 1

- [3] Qihang Yu, Jianming Zhang, He Zhang, Yilin Wang, Zhe Lin, Ning Xu, Yutong Bai, and Alan Yuille. Mask guided matting via progressive refinement network. In *Proceedings of*



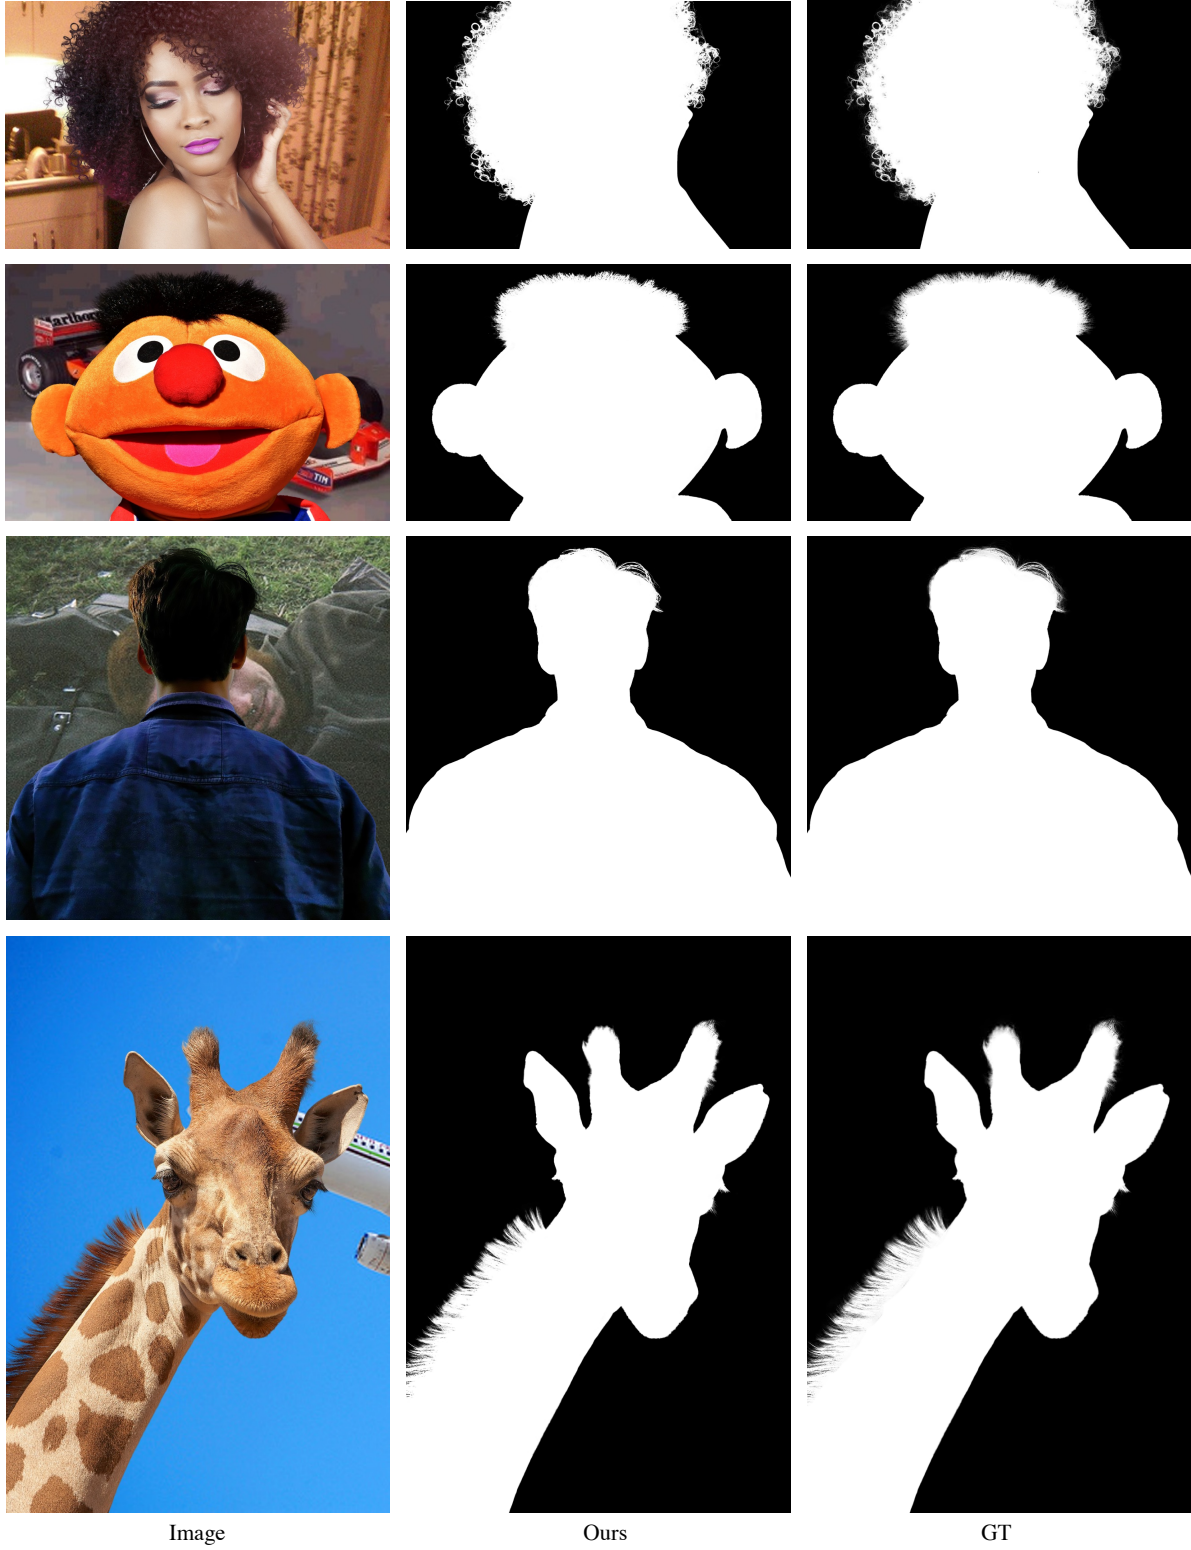

Figure 8. Qualitative results of our method on the Distinct-646 test set.

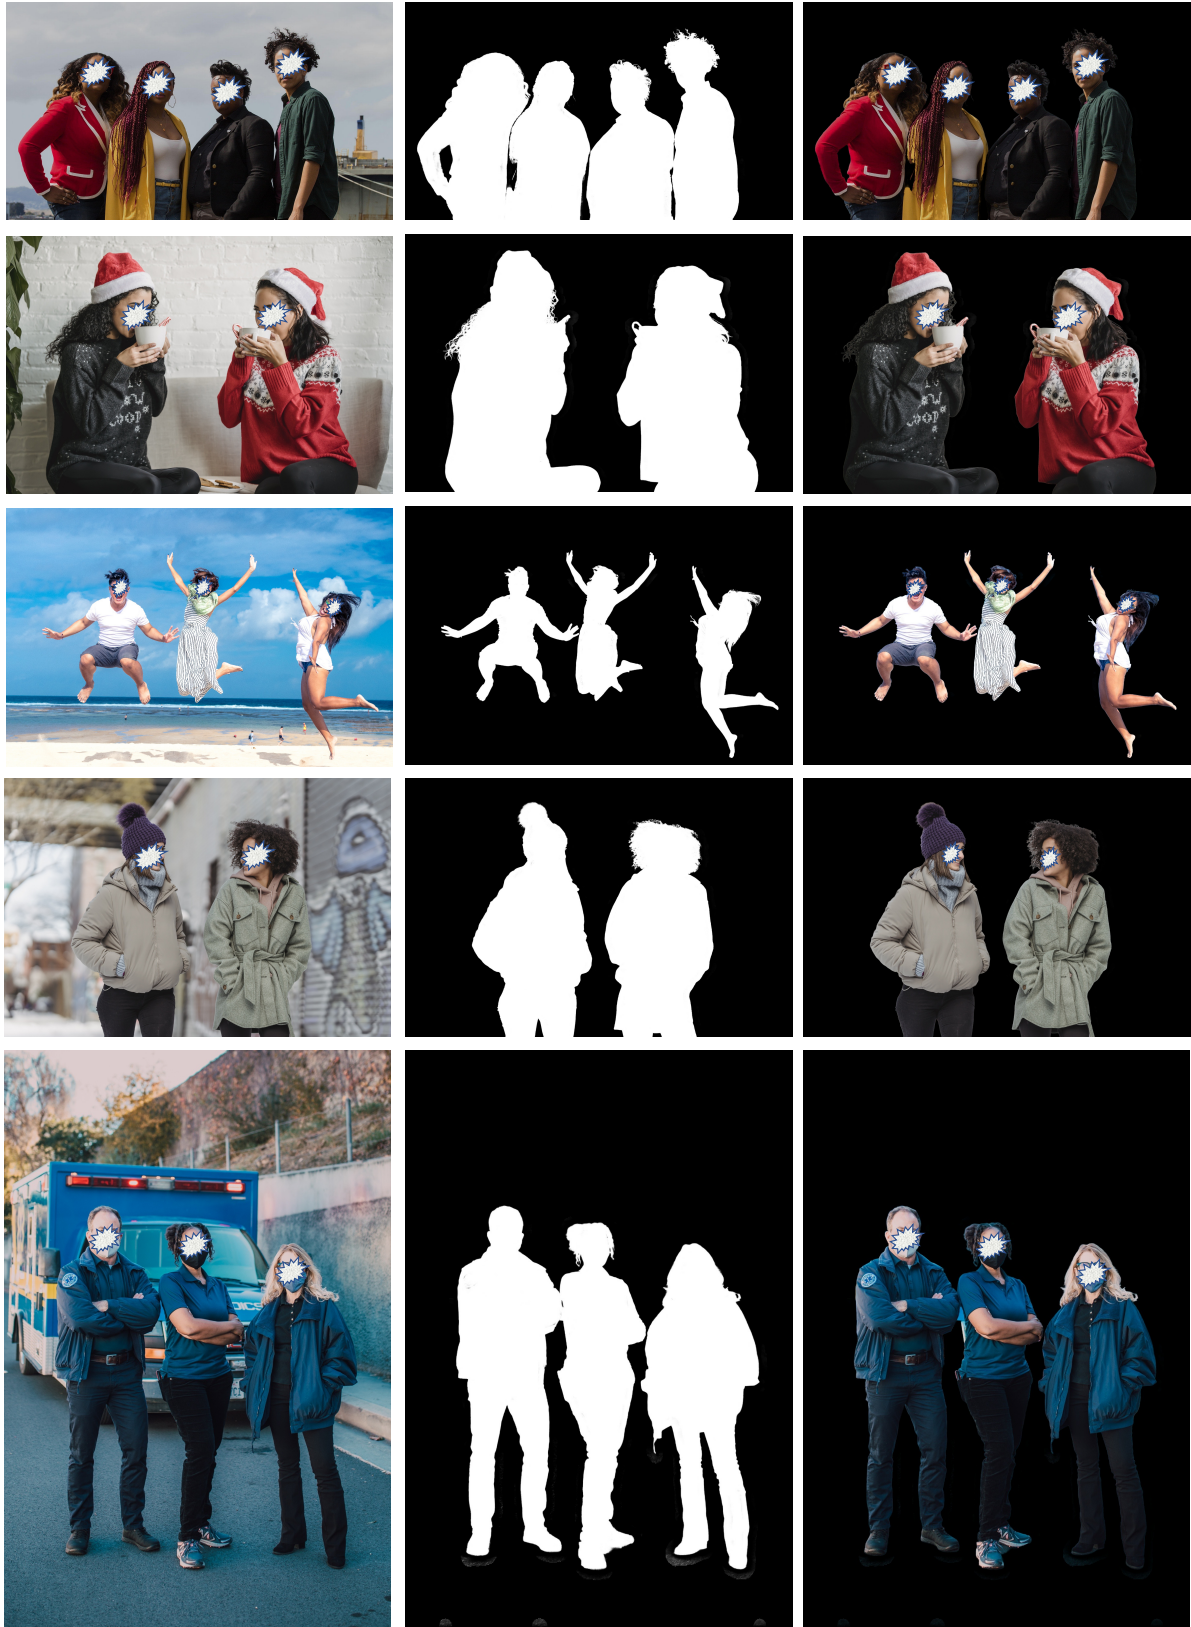

Image

Ours

Synthetic foreground

Figure 9. Qualitative results of our method on natural human images.
